## **Elevated serum aspartate aminotransferase levels concomitant with normal alanine aminotransferase levels in older low body weight people: Preliminary findings from a community-based epidemiological study**

Michi Shibata, Kei Nakajima

### **Background**

Serum enzyme levels, including hepatic transaminase, are unknown in older people with low body weight (LBW), who can easily experience sarcopenia. Therefore, we addressed preliminarily this issue in a cross-sectional study of an apparently healthy population.

**Methods.** We investigated the relationship of serum aspartate aminotransferase (AST), alanine aminotransferase (ALT), gamma glutamyl transpeptidase (GGT), alkaline phosphatase (ALP), lactate dehydrogenase (LDH), and total bilirubin levels with body mass index (BMI) and age in 79,623 subjects aged 20–80 years who underwent an annual checkup. The relationship between serum AST and serum creatinine, a surrogate marker of skeletal muscle mass, was also examined in 25,220 subjects who had data for serum creatinine.

**Results.** Serum levels of AST, ALP, and LDH levels were significantly higher in older ( $\geq 50$  years) non-obese subjects compared with younger ( $< 50$  years) corresponding subjects. Serum AST levels were significantly higher in older LBW subjects ( $\text{BMI} \leq 18.9 \text{ kg/m}^2$ ) than in those with a reference BMI of 20.9–22.9  $\text{kg/m}^2$ . Serum AST levels showed a J-shaped curve against BMI, whereas ALT and GGT levels showed a linear relationship, regardless of age. Serum levels of creatinine were significantly decreased across the increasing serum AST in men regardless of estimated glomerular filtration rate (eGFR) and women with  $\text{eGFR} \geq 60 \text{ mL/min/1.73 m}^2$  ( $p < 0.0001$ ).

### **Conclusion**

Elevated serum AST levels concomitant with normal ALT levels, which might reflect systemic damage of skeletal muscle, may be prevalent in older LBW people. These conditions may have involved skeletal muscle damage. Further studies need to determine

whether such a condition is equivalent to the etiology of sarcopenia.

1 **Elevated serum aspartate aminotransferase levels concomitant with normal alanine**  
2 **aminotransferase levels in older low body weight people: Preliminary findings from a**  
3 **community-based epidemiological study**

4

5 Michi Shibata<sup>1</sup>, Kei Nakajima<sup>1,2</sup>

6

7 <sup>1</sup>School of Nutrition and Dietetics, Faculty of Health and Social Services, Kanagawa University of

8 Human Services, 1-10-1 Heisei-cho, Yokosuka, Kanagawa 238-8522, Japan

9 <sup>2</sup>Department of Endocrinology and Diabetes, Saitama Medical Center, Saitama Medical University,

10 1981 Kamoda, Kawagoe, Saitama 350-8550, Japan

11

12

13 Corresponding author: Kei Nakajima, M.D., Ph.D.

14 School of Nutrition and Dietetics, Faculty of Health and Social Services, Kanagawa University of

15 Human Services, 1-10-1 Heisei-cho, Yokosuka, Kanagawa 238-8522, Japan.

16 E-mail: nakajima-rsh@kuhs.ac.jp; tel: +81-046-828-2660

17

18

1 **Abstract**

2 **Background.** Serum enzyme levels, including hepatic transaminase, are unknown in older  
3 people with low body weight (LBW), who can easily experience sarcopenia. Therefore, we  
4 addressed preliminarily this issue in a cross-sectional study of an apparently healthy  
5 population.

6 **Methods.** We investigated the relationship of serum aspartate aminotransferase (AST),  
7 alanine aminotransferase (ALT), gamma glutamyl transpeptidase (GGT), alkaline  
8 phosphatase (ALP), lactate dehydrogenase (LDH), and total bilirubin levels with body  
9 mass index (BMI) and age in 79,623 subjects aged 20–80 years who underwent an annual  
10 checkup. The relationship between serum AST and serum creatinine, a surrogate marker of  
11 skeletal muscle mass, was also examined in 25,220 subjects who had data for serum  
12 creatinine.

13 **Results.** Serum levels of AST, ALP, and LDH levels were significantly higher in older ( $\geq 50$   
14 years) non-obese subjects compared with younger ( $< 50$  years) corresponding subjects.  
15 Serum AST levels were significantly higher in older LBW subjects ( $\text{BMI} \leq 18.9 \text{ kg/m}^2$ ) than  
16 in those with a reference BMI of 20.9–22.9  $\text{kg/m}^2$ . Serum AST levels showed a J-shaped  
17 curve against BMI, whereas ALT and GGT levels showed a linear relationship, regardless  
18 of age. Serum levels of creatinine were significantly decreased across the increasing serum  
19 AST in men regardless of estimated glomerular filtration rate (eGFR) and women with  
20  $\text{eGFR} \geq 60 \text{ mL/min/1.73 m}^2$  ( $p < 0.0001$ ).

21 **Conclusion.** Elevated serum AST levels concomitant with normal ALT levels, which might  
22 reflect systemic damage of skeletal muscle, may be prevalent in older LBW people. These  
23 conditions may have involved skeletal muscle damage. Further studies need to determine  
24 whether such a condition is equivalent to the etiology of sarcopenia.

25  
26

1 Key words: **AST, ALT, BMI, low body weight, older people**

2

### 3 **Introduction**

4 Whether serum transaminase levels are decreased or increased in individuals with  
5 low-body weight (LBW) is unclear. In the geriatric population, LBW individuals are at  
6 increased risk for sarcopenia, an age-associated loss of muscle mass and function, which  
7 lead to disability, hospitalization, and death (Fielding et al. 2011, Calvani et al. 2015).

8 Aspartate aminotransferase (AST), alanine aminotransferase (ALT), and gamma glutamyl  
9 transpeptidase (GGT), which are routinely measured in an ordinary checkup, are present in  
10 multiple organs, including the liver, skeletal muscle, heart, and kidney (Lott and  
11 Landesman. 1984, Nathwani et al. 2005, Malakouti et al. 2017). However, ALT and GGT  
12 are predominantly found in the liver. Therefore, elevated serum AST levels concomitant  
13 with normal serum ALT levels could reflect injury of skeletal muscle and myocardium in  
14 clinical practice (Nathwani et al. 2005, Malakouti et al. 2017). Alkaline phosphatase (ALP)  
15 and lactate dehydrogenase (LDH) are also found in multiple organs, whereas ALP is  
16 preferentially included in bone tissue (Malakouti et al. 2017, Lowe and John. 2018). LDH  
17 is involved in similar organs, such the liver and skeletal muscle, where AST is found (Lott  
18 and Landesman. 1984, Nathwani et al. 2005, Malakouti et al. 2017).

19 We investigated the relationship of serum levels of AST, ALT, GGT, ALP, LDH, and total  
20 bilirubin, a marker of hepatic function (Gazzin et al. 2016), with body mass index (BMI) in  
21 an apparently healthy, general population aged from 20–80 years. To confirm that high  
22 serum AST with normal serum ALT can reflect skeletal muscle damage, the relationship  
23 between serum AST and serum creatinine, a surrogate marker of skeletal muscle mass  
24 (Hosten et al. 1990), was also examined.

25

### 26 **Methods**

1 This preliminary cross-sectional study was part of an observational study that was  
2 performed to examine the relationships between lifestyle-related diseases and  
3 cardiometabolic risk factors (Muneyuki et al. 2013). The current study involved 2  
4 institutions in Kanagawa and Saitama, Japan: Kanagawa University of Human Services and  
5 the Saitama Health Promotion Corporation, a public interest corporation. The protocol was  
6 approved by the Ethics Committees of Kanagawa University of Human Services  
7 (No.10-22). Informed consent was obtained from all patients who were included in the  
8 study.

## 9 10 ***Subjects***

11 Clinical data were obtained for 116,817 apparently healthy individuals, who underwent  
12 routine check-ups in Saitama Prefecture between April 2007 and March 2008. Inpatients  
13 and disabled individuals who could not move without assistance were not enrolled. After  
14 also excluding individuals with incomplete data of AST, ALT, and GGT, 79,623 subjects  
15 remained in the study (54,190 men and 25,433 women). To investigate the effect of age,  
16 subjects were divided into five age groups: 20–29, 30–39, 40–49, 50–59, and 60–80 years.  
17 The relationship between serum AST and serum creatinine was examined in a subgroup of  
18 subjects who had data of serum creatinine (n = 25,220) after the restriction of subjects with  
19 serum ALT of < 30 U/L, which was conducted because of exclusion of high AST due to  
20 hepatic damage.

1

2 ***Anthropometry and laboratory assays***

3 Anthropometric measurements and the collection of blood samples for laboratory analysis  
4 were performed in the morning. BMI was calculated as body weight (kg) divided by height  
5 squared ( $m^2$ ). Subjects were divided into six BMI categories ( $\leq 18.9$ , 19.0–20.9, 21.0–22.9,  
6 23.0–24.9, 25.0–26.9, and  $\geq 27.0$   $kg/m^2$ ), as previously reported (Muneyuki et al. 2013).  
7 Because the prevalence of underweight subjects ( $BMI < 18.5$   $kg/m^2$ ) in their 50s and older  
8 was low (3.3%) in this study, we defined the lowest BMI category as  $\leq 18.9$   $kg/m^2$ , which  
9 was termed as LBW. When we selected these BMI categories, we took into consideration  
10 that the World Health Organization proposed that the BMI cutoff points for overweight and  
11 obesity in Asian populations should be  $\geq 23.0$  and  $\geq 27.5$   $kg/m^2$ , respectively. These cutoff  
12 points are lower than those in Western countries (WHO Expert Consultation. 2004).  
13 To evaluate the relationship between serum AST and serum creatinine, serum AST level  
14 was classified into three ranges,  $< 20$  U/L, 20–29 U/L, and  $\geq 30$  U/L. The estimated  
15 glomerular filtration rate (eGFR) was calculated using the following equation:  $eGFR$   
16 ( $ml/min/1.73m^2$ ) =  $194 \times serum\ Cr^{-1.094} \times age^{-0.287}$  (if female)  $\times 0.739$ , where Cr denotes  
17 serum creatinine concentration (mg/dL) (Matsuo et al. 2009). The eGFR was divided into  
18 two groups:  $\geq 60$  and  $< 60$   $ml/min/1.73m^2$ , a criteria for chronic kidney disease because  
19 serum creatinine is elevated in patients with renal failure.

1

## 2 ***Statistical analysis***

3 Data in Figure are expressed as means  $\pm$  standard errors. Significant differences in  
4 parameteres between BMI categories were evaluated using analysis of variance (ANOVA).  
5 Significant differences in serum creatinine between three AST categories were also  
6 evaluated using ANOVA and post-hoc Bonferroni test. Differences between subjects with a  
7 provisional reference BMI of 21.0–22.9 kg/m<sup>2</sup> (Muneyuki et al. 2013, WHO Expert  
8 Consultation. 2004) and other BMI groups, and differences between the five age groups  
9 were evaluated using the *post-hoc* Bonferroni test and the Mann–Whitney test. Statistical  
10 analyses were performed using SAS-Enterprise Guide (SAS-EG 7.1; SAS Institute, Cary,  
11 NC, USA). P < 0.05 was considered to represent statistical significance.

12

## 13 **Results**

14 All serum enzymes, except for ALP, in subjects aged  $\geq 50$  years and LDH in those aged  $\geq$   
15 60 years, significantly increased across the increasing BMI categories (all P < 0.0001,  
16 ANOVA; **Figure 1**). AST, GGT, ALP, and LDH levels were significantly higher in older ( $\geq$   
17 50 years) non-obese subjects (BMI < 25.0 kg/m<sup>2</sup>) compared with younger (< 50 years)  
18 corresponding subjects (Mann–Whitney test, all P < 0.0001). Notably, serum AST levels in  
19 older LBW subjects were significantly higher than those in subjects with a provisional



1 reference BMI of 20.9–22.9 kg/m<sup>2</sup> (P = 0.0003, Bonferroni test). Consequently, serum AST  
2 levels showed a J-shaped curve against BMI in older subjects. However, ALT and GGT  
3 levels showed almost a linear relationship against BMI, regardless of age groups. No  
4 significant difference was observed in serum total bilirbin levels between BMI and age  
5 groups.

6 As shown in Figure 2, serum creatinine was decreased across the increasing AST in men  
7 regardless of eGFR and women with eGFR  $\geq$  60 mL/min/1.73 m<sup>2</sup> (ANOVA, all p <0.0001).  
8 In Addition, Post-hoc Bonferroni test indicated that serum creatinine in subjects with AST  
9  $\geq$  30 U/L was significantly lower than those with AST  $\leq$  19 U/L (all p <0.0001).

10

## 11 **Discussion**

12 To date, prevention of sarcopenia has been the focus of attention in aging societies  
13 (Fielding et al. 2011, Calvani et al. 2015). However, there is no blood marker for  
14 sarcopenia. A blood marker might enable us to detect sarcopenia earlier in the general  
15 population because the current definition of sarcopenia may be complicated and  
16 time-consuming to determine (Fielding et al. 2011, Calvani et al. 2015). The current  
17 preliminary study showed that LBW subjects in their  $\geq$  50s had elevated serum AST levels,  
18 which were accompanied by high ALP and LDH levels, but low to normal serum ALT levels,

1 compared with corresponding younger subjects and those with a reference BMI. To the best  
2 of our knowledge, this is the first report to show such an observation. Although all enzymes  
3 measured in this study are likely present in multiple organs, ALT and GGT are  
4 predominantly found in the liver (Lott and Landesman. 1984, Nathwani et al. 2005,  
5 Malakouti et al. 2017). Therefore, elevated AST concomitant with normal ALT levels,  
6 resulting in a dissociation between serum AST and ALT levels in older LBW subjects,  
7 suggests non-hepatic injury. This could reflect systemic damage of skeletal muscle mass,  
8 including the myocardium. Some studies have reported that low ALT levels may be  
9 associated with sarcopenia (Ruhl and Everhart. 2013, Vespasiani- Gentilucci et al. 2018)  
10 This is partially consistent with our results because LBW subjects in our study had low to  
11 normal ALT levels compared with normal weight and obese subjects (Figure 1). High  
12 serum ALP levels in older LBW subjects may be attributable to concurrently occurring  
13 damage in bone tissue (Malakouti et al. 2017, Lowe and John. 2018). This possibility  
14 deserves further study. Unfortunately, isoforms of enzymes and serum creatinine kinase  
15 were unavailable in this study, which is a major limitation of this study. Additionally, other  
16 conditions that only elicit elevated AST levels were not thoroughly excluded.

17 Although circulating creatine kinase, aldolase, and myoglobin are indicators of skeletal  
18 muscle damage, these parameters are only measured in the clinical setting if a patient  
19 complains of muscle pain or the physician suspects myositis. Therefore, in the current study,

1 we confirmed the inverse relationship between serum creatinine and serum AST in the  
2 subjects without high ALT, suggesting a rough trend that skeletal muscle mass is reduced in  
3 individuals with high AST and normal ALT.

4 In conclusion, older LBW people may have elevated AST comcomitant with normal ALT  
5 levels, compared with corresponding younger people and those with the reference BMI.  
6 These conditions may have involved skeletal muscle damage. Further study is required to  
7 determine whether this specific condition is equivalent to the etiology of sarcopenia.

8

#### 9 **Acknowledgments**

10 None

11

#### 12 **Declaration of Conflicting Interests**

13 The authors declare that there is no conflict of interest.

14

#### 15 **Supportive foundations**

16 None

17

#### 18 **Author contributions**

19 Shibata M and Nakajima K designed the study and analyzed the data. Nakajima K wrote  
20 the manuscript. Both authors have read and approved the final manuscript.

21

1 **References**

- 2 Calvani R, Marini F, Cesari M, Tosato M, Anker SD, von Haehling S, Miller RR, Bernabei  
3 R, Landi F, Marzetti E; SPRINTT consortium. 2015. Biomarkers for physical frailty  
4 and sarcopenia: state of the science and future developments. *J Cachexia Sarcopenia*  
5 *Muscle*. 6:278-86. doi: 10.1002/jcsm.12051.
- 6 Fielding RA, Vellas B, Evans WJ, et al. 2011. Sarcopenia: an undiagnosed condition in  
7 older adults. Current consensus definition: prevalence, etiology, and consequences.  
8 International working group on sarcopenia. *J Am Med Dir Assoc*. 12:249-56. doi:  
9 10.1016/j.jamda.2011.01.003.
- 10 Gazzin S, Vitek L, Watchko J, Shapiro SM, Tiribelli C. 2016. A Novel Perspective on the  
11 Biology of Bilirubin in Health and Disease. *Trends Mol Med*. 22:758-768. doi:  
12 10.1016/j.molmed.2016.07.004.
- 13 Hosten AO. BUN and Creatinine. In: Walker HK, Hall WD, Hurst JW, editors. *Clinical*  
14 *Methods: The History, Physical, and Laboratory Examinations*. 3rd edition. Boston:  
15 Butterworths; 1990. Chapter 193.
- 16 Lott JA, Landesman PW. The enzymology of skeletal muscle disorders. 1984. *Crit Rev*  
17 *Clin Lab Sci*. 20:153-90. DOI: 10.3109/10408368409165773.
- 18 Lowe D, John S. Alkaline Phosphatase. 2018. StatPearls [Internet]. Treasure Island (FL):  
19 StatPearls Publishing; 2018-.
- 20 Malakouti M, Kataria A, Ali SK, Schenker S. 2017. Elevated Liver Enzymes in  
21 Asymptomatic Patients - What Should I Do? *J Clin Transl Hepatol*. 5:394-403. doi:  
22 10.14218/JCTH.2017.00027.
- 23 Muneyuki T, Suwa K, Oshida H, et al. 2013. Design of the Saitama Cardiometabolic  
24 Disease and Organ Impairment Study (SCDOIS): A multidisciplinary observational  
25 epidemiological study. *Open J Endocr Metab Dis*. 2:144–56. DOI:

- 1           10.4236/ojemd.2013.32022
- 2   Matsuo S, Imai E, Horio M, et al. Revised equations for estimated GFR from serum  
3           creatinine in Japan. *Am J Kidney Dis* 2009;53:982–92.
- 4   Nathwani RA, Pais S, Reynolds TB, Kaplowitz N. 2005. Serum alanine aminotransferase  
5           in skeletal muscle diseases. *Hepatology*. 41:380-2. DOI: 10.1002/hep.20548
- 6   Ruhl CE, Everhart JE. 2013. The association of low serum alanine aminotransferase  
7           activity with mortality in the US population. *Am J Epidemiol*. 178:1702-11. doi:  
8           10.1093/aje/kwt209.
- 9   Vespasiani-Gentilucci U, De Vincentis A, Ferrucci L, Bandinelli S, Antonelli Incalzi R,  
10          Picardi A. 2018. Low Alanine Aminotransferase Levels in the Elderly Population:  
11          Frailty, Disability, Sarcopenia, and Reduced Survival. *J Gerontol A Biol Sci Med Sci*.  
12          73:925-930. doi: 10.1093/gerona/glx126.
- 13   WHO Expert Consultation. 2004. Appropriate body-mass index for Asian populations and  
14          its implications for policy and intervention strategies. *Lancet*. 363:157-63. DOI:  
15          10.1016/S0140-6736(03)15268-3

16

## 17   **Figure legend**

### 18   **Figure 1. Serum enzyme and total bilirubin levels according to BMI and age groups**

19   The symbols indicate the mean values of parameters. The vertical bars represent the  
20   standard error. BMI categories of one to six represent  $\leq 18.9$ , 19.0–20.9, 21.0–22.9,  
21   23.0–24.9, 25.0–26.9, and  $\geq 27.0$  kg/m<sup>2</sup>. The number of subjects was 1848, 1745, 1268, 971,  
22   and 384 in 20s, 30s, 40s, 50s, and 60-80 years old, 3694, 3773, 3160, 2768, and 873 in 20s,  
23   30s, 40s, 50s, and 60-80 years old, 4039, 4741, 4308, 4436, and 1541 in 20s, 30s, 40s, 50s,

1 and 60-80 years old, 2683, 3712, 4229, 4627, and 1656 in 20s, 30s, 40s, 50s, and 60-80  
2 years old, 1465, 2454, 2990, 3401, and 1141 in 20s, 30s, 40s, 50s, and 60-80 years old,  
3 1564, 3065, 3465, 2935, and 687 in 20s, 30s, 40s, 50s, and 60-80 years old, for the BMI  
4 categories from one to six (AST, ALT, and GGT). Data of ALP, LDH, and total bilirubin  
5 were available only in 20,773, 7050, and 9061 subjects in total, respectively.

6

7 **Figure 2. Serum creatinine levels according to three serum AST categories**

8 The symbols indicate the mean values of parameters. The vertical bars represent the  
9 standard error. Open and closed circles represent subjects with  $eGFR \geq 60 \text{ mL/min/1.73 m}^2$   
10 and subjects with  $eGFR < 60 \text{ mL/min/1.73 m}^2$ , respectively. \*  $P < 0.0001$ , Bonferroni test.

11 The number of subjects was 3268, 4430, and 343 in men with  $eGFR \geq 60 \text{ mL/min/1.73 m}^2$ ,  
12 and 2500, 4629, and 411 in men with  $eGFR < 60 \text{ mL/min/1.73 m}^2$ , and 60-80 years old,  
13 and 2210, 1212, and 46 in women with  $eGFR \geq 60 \text{ mL/min/1.73 m}^2$ , and 2987, 2967, and  
14 217, for the three AST categories.

15

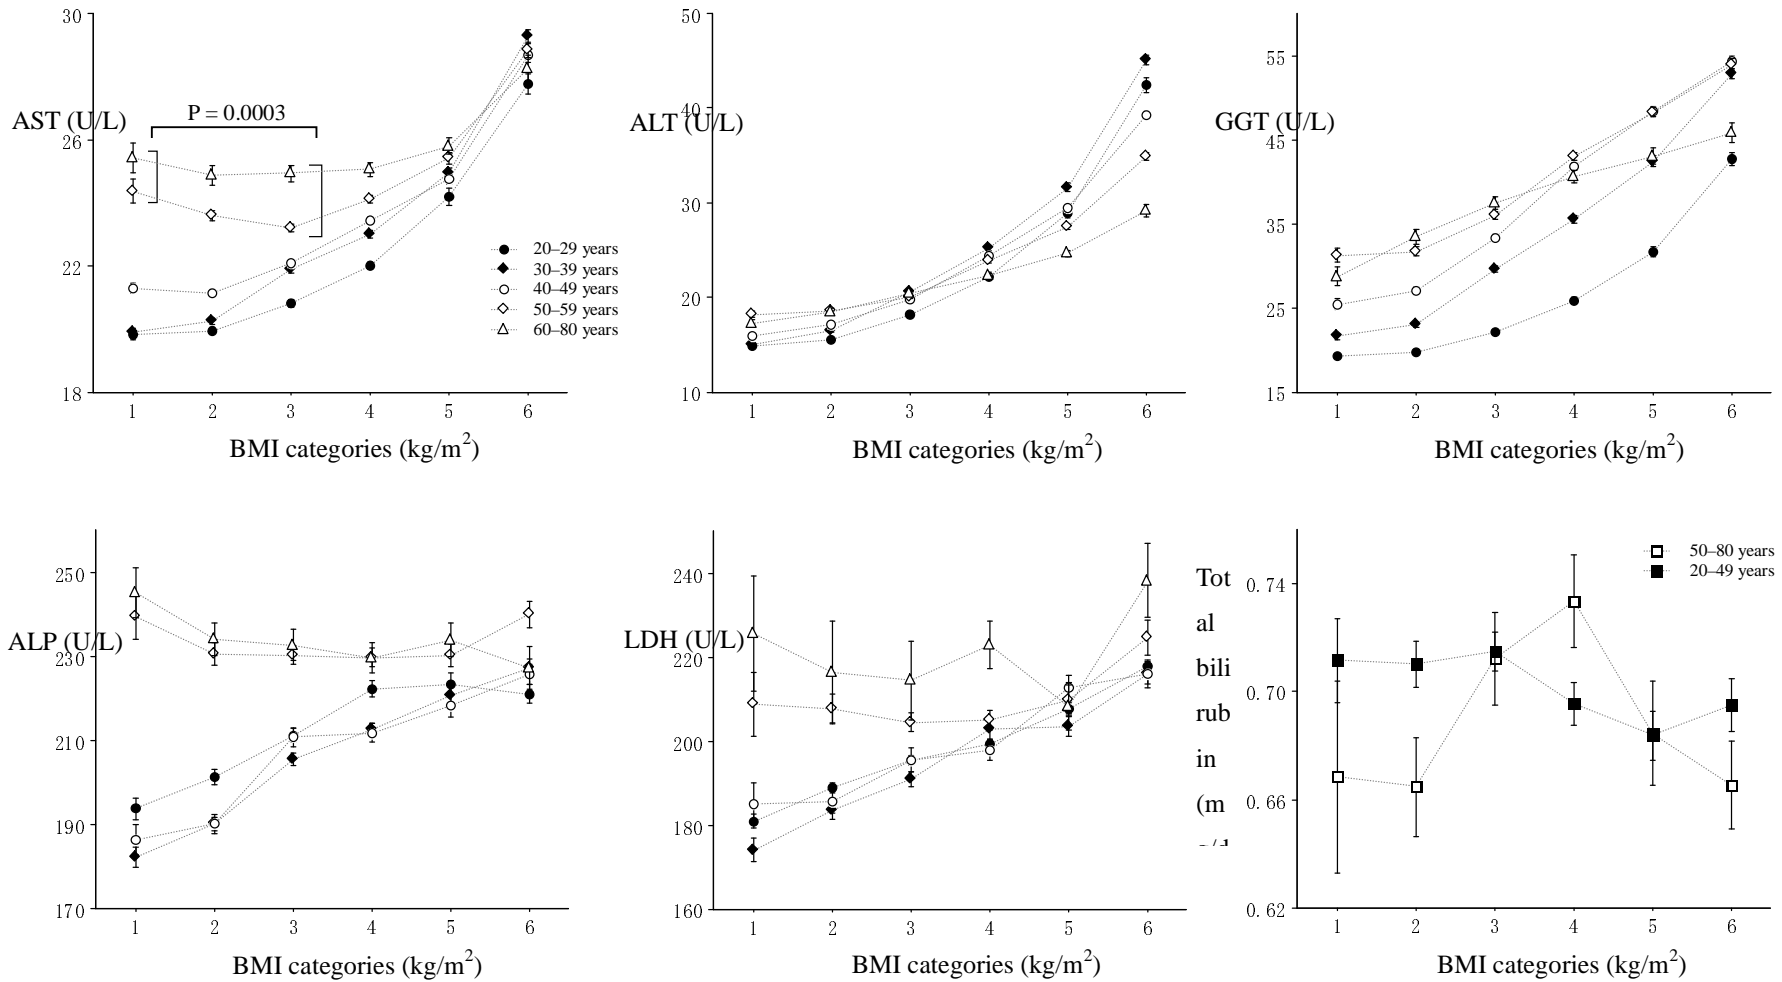

**Figure 1 Enzymes and BMI categories**

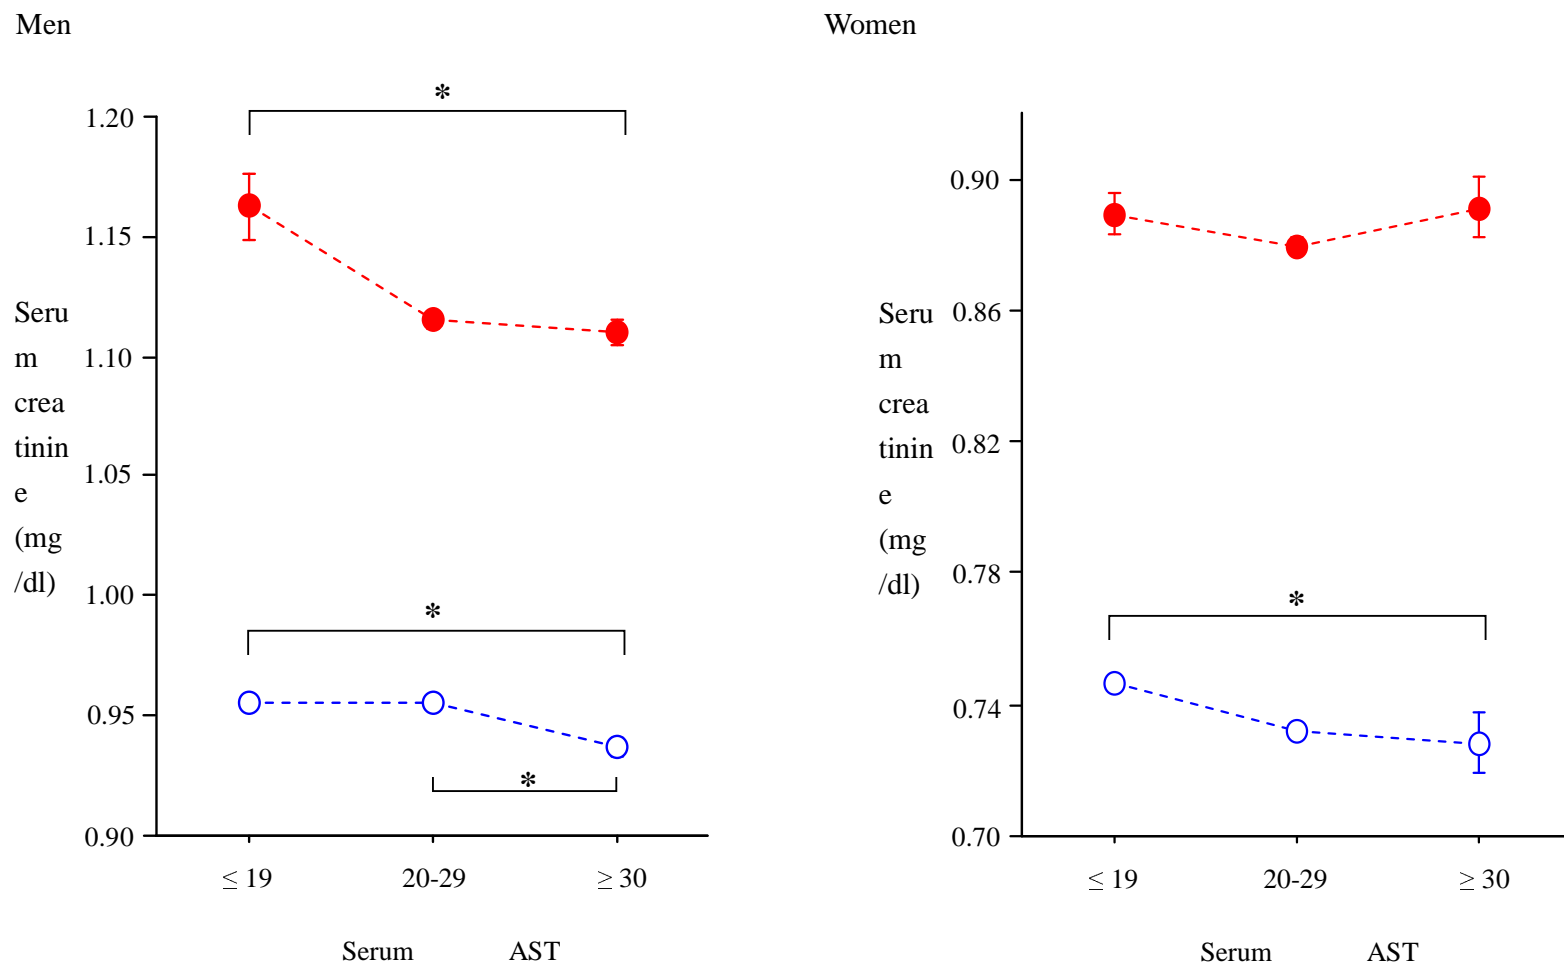

Figure 2 Serum Creatinine and serum AST categories
